# Supplementary material for: Mutational spectrum and phenotypic variability of VCP-related neurological disease in the UK
Source: HighWire-hosted journal article supplement (doi:10.1136/jnnp-2015-310362), 2015-06-23
Supplement: jnnp-2015-310362supp_table2.pdf [file jnnp-2015-310362supp_table2.pdf]

**Table 2 – Additional clinical findings**

| <b>Additional clinical findings</b>     | <b>(n)</b> | <b>%</b> |
|-----------------------------------------|------------|----------|
| Scapular winging                        | 20         | 50%      |
| Muscle pain and/or cramps               | 12         | 30.7%    |
| Asymmetrical involvement                | 9          | 23%      |
| Sphincter dysfunction                   | 9          | 23%      |
| Camptocormia or bent spine              | 6          | 15.4%    |
| Atrophic hands                          | 6          | 15.4%    |
| Finger extensors weakness               | 5          | 12.8%    |
| Autonomic, sensory and motor neuropathy | 3          | 7.8%     |
| Facial weakness                         | 3          | 7.7%     |
| Abdominal wall weakness                 | 2          | 5.1%     |
| Deafness                                | 2          | 5.1%     |
| Rheumatoid arthritis                    | 2          | 5.1%     |
| Ptosis + external ophtalmoparesis       | 1          | 2.6%     |
| Bull's eye maculopathy                  | 1          | 2.6%     |
| Gynecomastia                            | 1          | 2.6%     |
| Sleep apnoea                            | 1          | 2.6%     |
| Rigid spine                             | 1          | 2.6%     |
| Hand tremor                             | 1          | 2.6%     |
| Parkinson's Disease                     | 1          | 2.6%     |

**Legend:** Additional clinical findings reported in our cohort.  
(n) Number of affected. % = (n)/39
